# Supplementary material for: Detection of Ascorbic Acid by Two-Dimensional Conductive Metal-Organic Framework-Based Electrochemical Sensors
Source: MDPI journal article supplement (doi:10.3390/molecules29112413), 2024-05-21
Supplement: s1 [file s1]

# Detection of Ascorbic Acid by Two-Dimensional Conductive Metal–Organic Framework-Based Electrochemical Sensors

Shi Wang <sup>†</sup>, Ping Li <sup>†</sup>, Junyi Wang, Jun Gong, Helin Lu, Xiaobo Wang, Quan Wang <sup>\*</sup> and Ping Xue <sup>\*</sup>

School of Pharmacy, Xianning Medical College, Hubei University of Science and Technology, Xianning 437100, China; hkwangshi@hbust.edu.cn (S.W.); liping232022@outlook.com (P.L.); waonihaoa1@outlook.com (J.W.); gongjun@hbust.edu.cn (J.G.); hllu@hbust.edu.cn (H.L.); eas7on@163.com (X.W.)

<sup>\*</sup> Correspondence: wangquan@hbust.edu.cn (Q.W.); pingxue@hbust.edu.cn (P.X.)

<sup>†</sup> These authors contributed equally to this work.

**Table S1.** Parallel experiments of Cu<sub>3</sub>(HHTP)<sub>2</sub>/SPE sensors.

| Current of oxidation peak (μA) |       | Current of oxidation peak (μA) |       |
|--------------------------------|-------|--------------------------------|-------|
| 1                              | 9.44  | 7                              | 11.57 |
| 2                              | 10.80 | 8                              | 10.32 |
| 3                              | 10.99 | 9                              | 11.65 |
| 4                              | 11.10 | 10                             | 10.50 |
| 5                              | 10.78 | 11                             | 10.28 |
| 6                              | 10.70 | 12                             | 10.58 |

**Citation:** Wang, S.; Li, P.; Wang, J.; Gong, J.; Lu, H.; Wang, X.; Wang, Q.; Xue, P. Detection of Ascorbic Acid by Two-Dimensional Conductive Metal–Organic Framework-Based Electrochemical Sensors. *Molecules* **2024**, *29*, 2413. <https://doi.org/10.3390/molecules29112413>

Academic Editor: Dong-Kyun Seo

Received: 18 April 2024

Revised: 9 May 2024

Accepted: 16 May 2024

Published: 21 May 2024

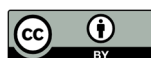

**Copyright:** © 2024 by the authors. Submitted for possible open access publication under the terms and conditions of the Creative Commons Attribution (CC BY) license (<https://creativecommons.org/licenses/by/4.0/>).

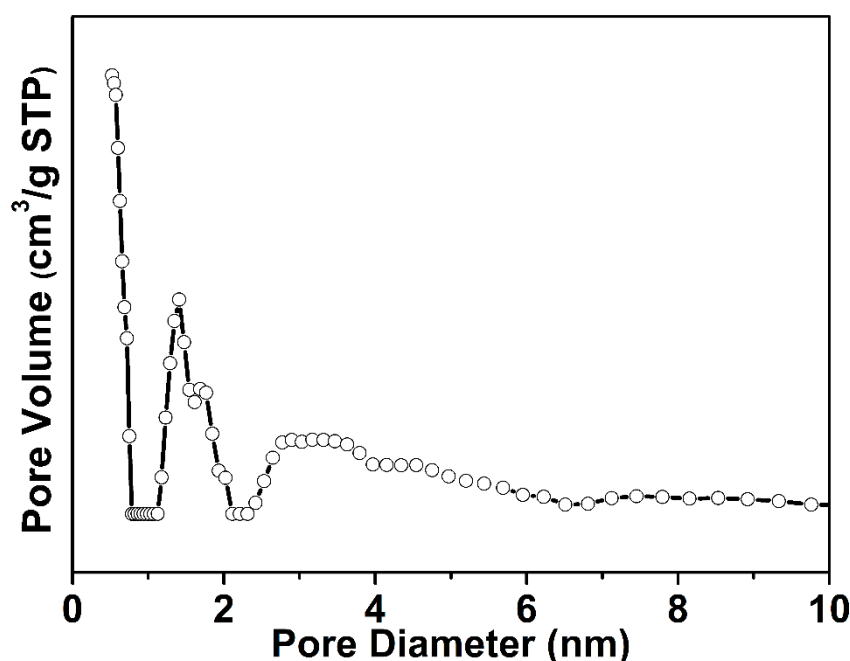

**Figure S1.** Pore size distributions of Cu<sub>3</sub>(HHTP)<sub>2</sub>.

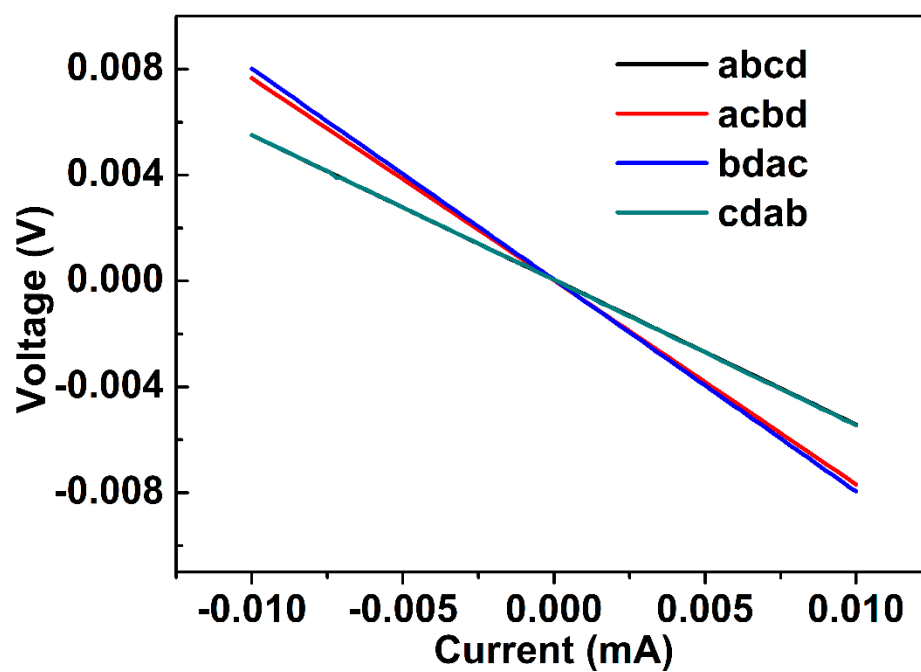

Figure S2. Four-point probe I-V curves of  $\text{Cu}_3(\text{HHTP})_2$ .

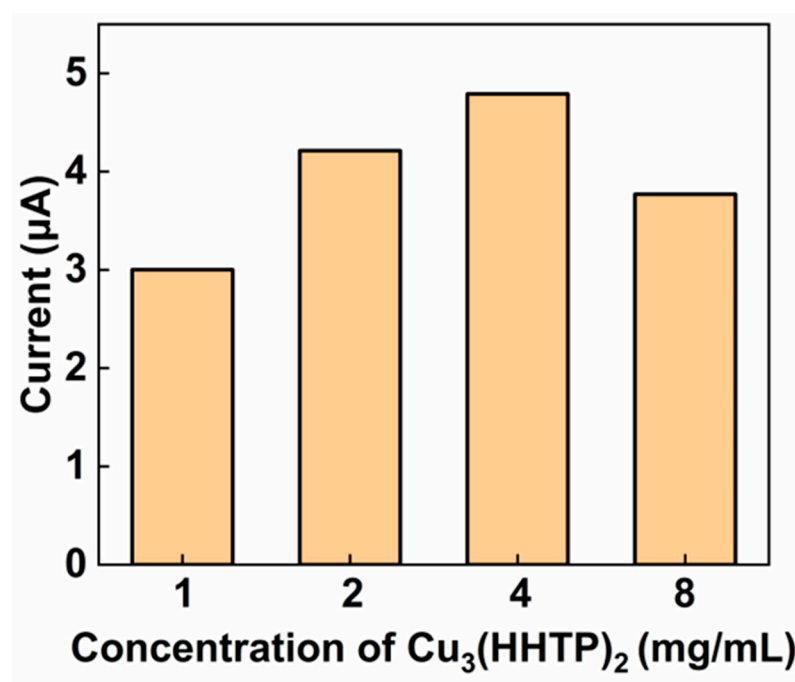

Figure S3. Effects of  $\text{Cu}_3(\text{HHTP})_2$  concentration on the electrocatalytic performance of  $\text{Cu}_3(\text{HHTP})_2/\text{SPE}$  sensor.

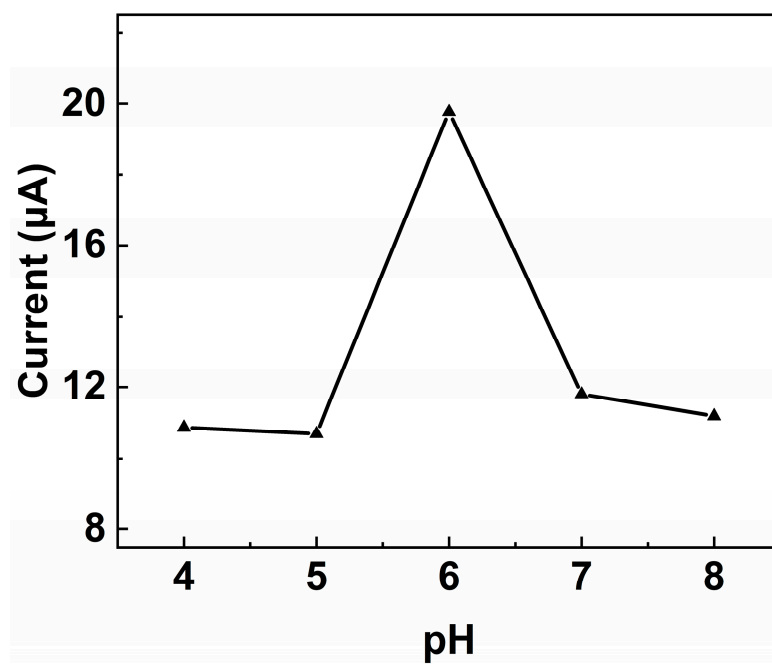

Figure S4. Effects of pH on the electrocatalytic performance of  $\text{Cu}_3(\text{HHTP})_2/\text{SPE}$  sensor.

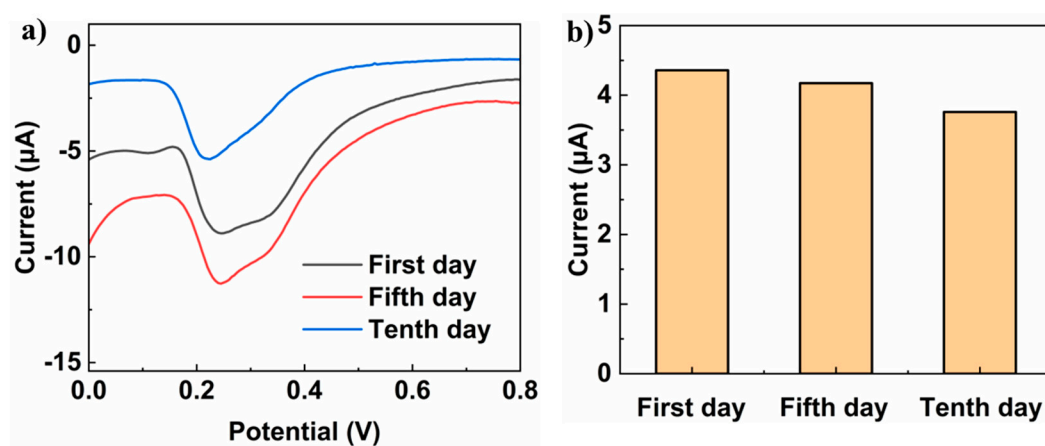

Figure S5. a) The CV curves of  $\text{Cu}_3(\text{HHTP})_2/\text{SPE}$  in AA at different times; b) Bar chart of AA response current of  $\text{Cu}_3(\text{HHTP})_2/\text{SPE}$  at different times.
